# Supplementary material for: Effect of Fluorosis on Liver Cells of VC Deficient and Wild Type Mice
Source: Hindawi journal article supplement (doi:10.1155/2014/287464), 2014-01-01
Supplement: f1 [file 287464.f1.pdf]

Supplementary Table s1. Spearman rank correlation among mouse three oxidative genes (Mouse without Gulo)

Spearman Rank Correlation (rho)

|                                          | <a href="#">Trait1</a>                                                                                                     | <a href="#">Trait2</a>           | <a href="#">Trait3</a>           | <a href="#">Trait4</a>       | <a href="#">Trait5</a>     | <a href="#">Trait6</a>     | <a href="#">Trait7</a>           | <a href="#">Trait8</a>    | <a href="#">Trait9</a>     | <a href="#">Trait10</a>    | <a href="#">Trait11</a>    | <a href="#">Trait12</a>   | <a href="#">Trait13</a>    | <a href="#">Trait14</a>          | <a href="#">Trait15</a>   | <a href="#">Trait16</a>    | <a href="#">Trait17</a>    |                            |
|------------------------------------------|----------------------------------------------------------------------------------------------------------------------------|----------------------------------|----------------------------------|------------------------------|----------------------------|----------------------------|----------------------------------|---------------------------|----------------------------|----------------------------|----------------------------|---------------------------|----------------------------|----------------------------------|---------------------------|----------------------------|----------------------------|----------------------------|
| P<br>e<br>a<br>r<br>s<br>o<br>n<br><br>r | <a href="#">Trait 1: GSE16780 UCLA ML0911::1416429 a at A</a><br>Cat on Chr 2 @ 103.294184 Mb<br>catalase<br>distal 3' UTR | <b><u>n</u></b><br><u>32</u>     | <b><u>0.752</u></b><br><u>32</u> | <u>0.141</u><br><u>32</u>    | <u>-0.324</u><br><u>32</u> | <u>0.093</u><br><u>32</u>  | <u>0.209</u><br><u>32</u>        | <u>0.189</u><br><u>32</u> | <u>0.404</u><br><u>32</u>  | <u>-0.044</u><br><u>32</u> | <u>-0.072</u><br><u>32</u> | <u>0.451</u><br><u>32</u> | <u>-0.144</u><br><u>32</u> | <b><u>0.514</u></b><br><u>32</u> | <u>0.366</u><br><u>32</u> | <u>0.178</u><br><u>32</u>  | <u>-0.318</u><br><u>32</u> | <u>-0.367</u><br><u>32</u> |
|                                          | <a href="#">Trait 2: GSE16780 UCLA ML0911::1416430 at A</a><br>Cat on Chr 2 @ 103.29421 Mb<br>catalase<br>mid 3' UTR       | <b><u>0.754</u></b><br><u>32</u> | <b><u>n</u></b><br><u>32</u>     | <u>0.237</u><br><u>32</u>    | <u>-0.289</u><br><u>32</u> | <u>-0.040</u><br><u>32</u> | <u>0.035</u><br><u>32</u>        | <u>0.231</u><br><u>32</u> | <u>0.180</u><br><u>32</u>  | <u>0.107</u><br><u>32</u>  | <u>-0.010</u><br><u>32</u> | <u>0.349</u><br><u>32</u> | <u>-0.044</u><br><u>32</u> | <b><u>0.589</u></b><br><u>32</u> | <u>0.464</u><br><u>32</u> | <u>0.237</u><br><u>32</u>  | <u>-0.023</u><br><u>32</u> | <u>-0.172</u><br><u>32</u> |
|                                          | <a href="#">Trait 3: GSE16780 UCLA ML0911::1460671 at A</a><br>Gpx1 on Chr 9 @ 108.241871 Mb                               | <u>0.152</u><br><u>32</u>        | <u>0.247</u><br><u>32</u>        | <b><u>n</u></b><br><u>32</u> | <u>-0.144</u><br><u>32</u> | <u>0.475</u><br><u>32</u>  | <b><u>0.537</u></b><br><u>32</u> | <u>0.253</u><br><u>32</u> | <u>-0.120</u><br><u>32</u> | <u>0.137</u><br><u>32</u>  | <u>0.179</u><br><u>32</u>  | <u>0.366</u><br><u>32</u> | <u>-0.135</u><br><u>32</u> | <u>0.410</u><br><u>32</u>        | <u>0.416</u><br><u>32</u> | <u>-0.162</u><br><u>32</u> | <u>0.043</u><br><u>32</u>  | <u>-0.359</u><br><u>32</u> |

|                                                                                                                                                    |                                       |                                       |                                       |                                         |                                         |                                         |                                         |                                       |                                       |                                       |                                       |                                       |                                       |                                       |                                       |                                       |                                       |
|----------------------------------------------------------------------------------------------------------------------------------------------------|---------------------------------------|---------------------------------------|---------------------------------------|-----------------------------------------|-----------------------------------------|-----------------------------------------|-----------------------------------------|---------------------------------------|---------------------------------------|---------------------------------------|---------------------------------------|---------------------------------------|---------------------------------------|---------------------------------------|---------------------------------------|---------------------------------------|---------------------------------------|
| glutathione peroxidase 1<br>exons 1 and 2 and proximal 3' UTR                                                                                      |                                       |                                       |                                       |                                         |                                         |                                         |                                         |                                       |                                       |                                       |                                       |                                       |                                       |                                       |                                       |                                       |                                       |
| <a href="#">Trait 4: GSE16780 UCLA ML0911::1449106 at A</a><br>Gpx3 on Chr 11 @ 54.723291 Mb<br>glutathione peroxidase 3<br>3' UTR                 | <u><math>\frac{-0.445}{32}</math></u> | <u><math>\frac{-0.478}{32}</math></u> | <u><math>\frac{-0.335}{32}</math></u> | <b><u><math>\frac{n}{32}</math></u></b> | <u><math>\frac{-0.073}{32}</math></u>   | <u><math>\frac{-0.096}{32}</math></u>   | <u><math>\frac{-0.085}{32}</math></u>   | <u><math>\frac{-0.268}{32}</math></u> | <u><math>\frac{0.254}{32}</math></u>  | <u><math>\frac{-0.006}{32}</math></u> | <u><math>\frac{-0.471}{32}</math></u> | <u><math>\frac{0.177}{32}</math></u>  | <u><math>\frac{-0.238}{32}</math></u> | <u><math>\frac{-0.173}{32}</math></u> | <u><math>\frac{-0.343}{32}</math></u> | <u><math>\frac{0.079}{32}</math></u>  | <u><math>\frac{0.238}{32}</math></u>  |
| <a href="#">Trait 5: GSE16780 UCLA ML0911::1451695 a at A</a><br>Gpx4 on Chr 10 @ 45.595286 Mb<br>glutathione peroxidase 4<br>last five exons      | <u><math>\frac{0.016}{32}</math></u>  | <u><math>\frac{0.004}{32}</math></u>  | <u><math>\frac{0.654}{32}</math></u>  | <u><math>\frac{-0.125}{32}</math></u>   | <b><u><math>\frac{n}{32}</math></u></b> | <u><math>\frac{0.666}{32}</math></u>    | <u><math>\frac{0.220}{32}</math></u>    | <u><math>\frac{0.248}{32}</math></u>  | <u><math>\frac{-0.102}{32}</math></u> | <u><math>\frac{0.512}{32}</math></u>  | <u><math>\frac{0.387}{32}</math></u>  | <u><math>\frac{-0.289}{32}</math></u> | <u><math>\frac{0.194}{32}</math></u>  | <u><math>\frac{0.258}{32}</math></u>  | <u><math>\frac{0.076}{32}</math></u>  | <u><math>\frac{0.084}{32}</math></u>  | <u><math>\frac{-0.403}{32}</math></u> |
| <a href="#">Trait 6: GSE16780 UCLA ML0911::1456193 x at A</a><br>Gpx4 on Chr 10 @ 45.595578 Mb<br>glutathione peroxidase 4<br>last exon and 3' UTR | <u><math>\frac{0.170}{32}</math></u>  | <u><math>\frac{0.122}{32}</math></u>  | <u><math>\frac{0.704}{32}</math></u>  | <u><math>\frac{-0.195}{32}</math></u>   | <u><math>\frac{0.804}{32}</math></u>    | <b><u><math>\frac{n}{32}</math></u></b> | <u><math>\frac{0.429}{32}</math></u>    | <u><math>\frac{0.115}{32}</math></u>  | <u><math>\frac{-0.018}{32}</math></u> | <u><math>\frac{0.376}{32}</math></u>  | <u><math>\frac{0.441}{32}</math></u>  | <u><math>\frac{-0.262}{32}</math></u> | <u><math>\frac{0.328}{32}</math></u>  | <u><math>\frac{0.458}{32}</math></u>  | <u><math>\frac{-0.242}{32}</math></u> | <u><math>\frac{-0.125}{32}</math></u> | <u><math>\frac{-0.151}{32}</math></u> |
| <a href="#">Trait 7: GSE16780 UCLA ML0911::1420698 at A</a><br>Gpx5 on Chr 13 @ 21.378334 Mb<br>glutathione peroxidase 5<br>distal 3' UTR          | <u><math>\frac{0.137}{32}</math></u>  | <u><math>\frac{0.248}{32}</math></u>  | <u><math>\frac{0.326}{32}</math></u>  | <u><math>\frac{-0.017}{32}</math></u>   | <u><math>\frac{0.301}{32}</math></u>    | <u><math>\frac{0.423}{32}</math></u>    | <b><u><math>\frac{n}{32}</math></u></b> | <u><math>\frac{0.089}{32}</math></u>  | <u><math>\frac{-0.061}{32}</math></u> | <u><math>\frac{0.009}{32}</math></u>  | <u><math>\frac{0.113}{32}</math></u>  | <u><math>\frac{-0.219}{32}</math></u> | <u><math>\frac{0.261}{32}</math></u>  | <u><math>\frac{0.398}{32}</math></u>  | <u><math>\frac{-0.361}{32}</math></u> | <u><math>\frac{0.173}{32}</math></u>  | <u><math>\frac{0.212}{32}</math></u>  |

|                                                                                                                                                                     |                     |                     |                           |                            |                     |                     |                     |                       |                       |                       |                       |                       |                     |                     |                     |                     |                     |
|---------------------------------------------------------------------------------------------------------------------------------------------------------------------|---------------------|---------------------|---------------------------|----------------------------|---------------------|---------------------|---------------------|-----------------------|-----------------------|-----------------------|-----------------------|-----------------------|---------------------|---------------------|---------------------|---------------------|---------------------|
| <a href="#">Trait 8: GSE16780 UCLA ML0911::1452135 at A</a><br>Gpx6 on Chr 13 @ 21.410881 Mb<br>glutathione peroxidase 6                                            | <u>0.417</u><br>32  | <u>0.329</u><br>32  | <u>-0.017</u><br>32       | <u>-0.255</u><br>32        | <u>0.148</u><br>32  | <u>0.043</u><br>32  | <u>0.245</u><br>32  | <b><i>n</i></b><br>32 | <u>-0.264</u><br>32   | <u>0.188</u><br>32    | <u>0.366</u><br>32    | <u>-0.182</u><br>32   | <u>0.153</u><br>32  | <u>0.049</u><br>32  | <u>0.139</u><br>32  | <u>-0.387</u><br>32 | <u>-0.283</u><br>32 |
| <a href="#">Trait 9: GSE16780 UCLA ML0911::1417836 at A</a><br>Gpx7 on Chr 4 @ 108.073058 Mb<br>glutathione peroxidase 7                                            | <u>-0.223</u><br>32 | <u>-0.037</u><br>32 | <u>0.046</u><br>32        | <u>0.270</u><br>32         | <u>-0.099</u><br>32 | <u>-0.058</u><br>32 | <u>0.021</u><br>32  | <u>-0.076</u><br>32   | <b><i>n</i></b><br>32 | <u>0.349</u><br>32    | <u>-0.422</u><br>32   | <u>-0.023</u><br>32   | <u>0.199</u><br>32  | <u>0.161</u><br>32  | <u>0.185</u><br>32  | <u>0.238</u><br>32  | <u>0.280</u><br>32  |
| <a href="#">Trait 10: GSE16780 UCLA ML0911::1424099 at A</a><br>Gpx8 on Chr 13 @ 113.833243 Mb<br>glutathione peroxidase 8<br>last 2 exons and proximal 3' UTR      | <u>-0.296</u><br>32 | <u>-0.186</u><br>32 | <u>0.239</u><br>32        | <u>0.014</u><br>32         | <u>0.472</u><br>32  | <u>0.429</u><br>32  | <u>-0.078</u><br>32 | <u>-0.012</u><br>32   | <u>0.462</u><br>32    | <b><i>n</i></b><br>32 | <u>0.125</u><br>32    | <u>-0.235</u><br>32   | <u>0.124</u><br>32  | <u>0.220</u><br>32  | <u>0.226</u><br>32  | <u>0.241</u><br>32  | <u>0.007</u><br>32  |
| <a href="#">Trait 11: GSE16780 UCLA ML0911::1451124 at A</a><br>Sod1 on Chr 16 @ 90.223027 Mb<br>superoxide dismutase 1, soluble<br>first four exons and 3' UTR     | <u>0.433</u><br>32  | <u>0.376</u><br>32  | <b><u>0.503</u></b><br>32 | <b><u>-0.555</u></b><br>32 | <u>0.428</u><br>32  | <u>0.490</u><br>32  | <u>0.008</u><br>32  | <u>0.269</u><br>32    | <u>-0.362</u><br>32   | <u>0.107</u><br>32    | <b><i>n</i></b><br>32 | <u>-0.363</u><br>32   | <u>0.397</u><br>32  | <u>0.401</u><br>32  | <u>0.124</u><br>32  | <u>-0.261</u><br>32 | <u>-0.500</u><br>32 |
| <a href="#">Trait 12: GSE16780 UCLA ML0911::1435304 at A</a><br>Sod1 on Chr 16 @ 90.22488 Mb<br>superoxide dismutase 1, soluble<br>antisense in intron 3 and exon 4 | <u>-0.028</u><br>32 | <u>-0.052</u><br>32 | <u>-0.087</u><br>32       | <u>0.092</u><br>32         | <u>-0.187</u><br>32 | <u>-0.151</u><br>32 | <u>-0.213</u><br>32 | <u>-0.116</u><br>32   | <u>-0.097</u><br>32   | <u>-0.224</u><br>32   | <u>-0.212</u><br>32   | <b><i>n</i></b><br>32 | <u>-0.113</u><br>32 | <u>-0.203</u><br>32 | <u>-0.053</u><br>32 | <u>-0.034</u><br>32 | <u>0.103</u><br>32  |

|                                                                                                                                                                                |                     |                     |                     |                     |                     |                     |                     |                     |                    |                     |                     |                     |                     |                     |                     |                     |                     |
|--------------------------------------------------------------------------------------------------------------------------------------------------------------------------------|---------------------|---------------------|---------------------|---------------------|---------------------|---------------------|---------------------|---------------------|--------------------|---------------------|---------------------|---------------------|---------------------|---------------------|---------------------|---------------------|---------------------|
| <a href="#">Trait 13: GSE16780 UCLA ML0911::1417193 at A</a><br>Sod2 on Chr 17 @ 13.206311 Mb<br>superoxide dismutase 2, mitochondrial<br>last three exons and proximal 3' UTR | <u>0.500</u><br>32  | <u>0.678</u><br>32  | <u>0.467</u><br>32  | <u>-0.426</u><br>32 | <u>0.328</u><br>32  | <u>0.449</u><br>32  | <u>0.307</u><br>32  | <u>0.325</u><br>32  | <u>0.024</u><br>32 | <u>0.076</u><br>32  | <u>0.549</u><br>32  | <u>-0.124</u><br>32 | <b>n</b><br>32      | <u>0.906</u><br>32  | <u>0.114</u><br>32  | <u>-0.134</u><br>32 | <u>-0.355</u><br>32 |
| <a href="#">Trait 14: GSE16780 UCLA ML0911::1448610 a at A</a><br>Sod2 on Chr 17 @ 13.208027 Mb<br>superoxide dismutase 2, mitochondrial<br>last exon and proximal 3' UTR      | <u>0.356</u><br>32  | <u>0.522</u><br>32  | <u>0.525</u><br>32  | <u>-0.310</u><br>32 | <u>0.422</u><br>32  | <u>0.586</u><br>32  | <u>0.433</u><br>32  | <u>0.214</u><br>32  | <u>0.039</u><br>32 | <u>0.205</u><br>32  | <u>0.514</u><br>32  | <u>-0.206</u><br>32 | <u>0.909</u><br>32  | <b>n</b><br>32      | <u>0.025</u><br>32  | <u>-0.020</u><br>32 | <u>-0.249</u><br>32 |
| <a href="#">Trait 15: GSE16780 UCLA ML0911::1417194 at A</a><br>Sod2 on Chr 17 @ 13.20865 Mb<br>superoxide dismutase 2, mitochondrial                                          | <u>0.219</u><br>32  | <u>0.200</u><br>32  | <u>-0.094</u><br>32 | <u>-0.295</u><br>32 | <u>0.049</u><br>32  | <u>-0.153</u><br>32 | <u>-0.237</u><br>32 | <u>0.314</u><br>32  | <u>0.204</u><br>32 | <u>0.168</u><br>32  | <u>0.246</u><br>32  | <u>-0.066</u><br>32 | <u>0.244</u><br>32  | <u>0.123</u><br>32  | <b>n</b><br>32      | <u>0.140</u><br>32  | <u>-0.216</u><br>32 |
| <a href="#">Trait 16: GSE16780 UCLA ML0911::1417634 at A</a><br>Sod3 on Chr 5 @ 52.759404 Mb<br>superoxide dismutase 3, extracellular                                          | <u>-0.401</u><br>32 | <u>-0.011</u><br>32 | <u>0.022</u><br>32  | <u>-0.081</u><br>32 | <u>0.082</u><br>32  | <u>-0.105</u><br>32 | <u>0.193</u><br>32  | <u>-0.281</u><br>32 | <u>0.141</u><br>32 | <u>0.207</u><br>32  | <u>-0.225</u><br>32 | <u>-0.244</u><br>32 | <u>-0.115</u><br>32 | <u>-0.045</u><br>32 | <u>-0.057</u><br>32 | <b>n</b><br>32      | <u>0.346</u><br>32  |
| <a href="#">Trait 17: GSE16780 UCLA ML0911::1417633 at A</a><br>Sod3 on Chr 5 @ 52.760191 Mb<br>superoxide dismutase 3, extracellular                                          | <u>-0.362</u><br>32 | <u>-0.326</u><br>32 | <u>-0.400</u><br>32 | <u>0.295</u><br>32  | <u>-0.407</u><br>32 | <u>-0.276</u><br>32 | <u>0.163</u><br>32  | <u>-0.260</u><br>32 | <u>0.082</u><br>32 | <u>-0.055</u><br>32 | <u>-0.465</u><br>32 | <u>0.084</u><br>32  | <u>-0.542</u><br>32 | <u>-0.409</u><br>32 | <u>-0.402</u><br>32 | <u>0.400</u><br>32  | <b>n</b><br>32      |

Supplementary Table s2. Spearman rank correlation of three oxidative genes among humans (Human liver)

Spearman Rank Correlation (rho)

|                                                                                                                                | Trait1               | Trait2               | Trait3               | Trait4               | Trait5               | Trait6               | Trait7               | Trait8               | Trait9               | Trait10              | Trait11              | Trait12              | Trait13              | Trait14              | Trait15              |
|--------------------------------------------------------------------------------------------------------------------------------|----------------------|----------------------|----------------------|----------------------|----------------------|----------------------|----------------------|----------------------|----------------------|----------------------|----------------------|----------------------|----------------------|----------------------|----------------------|
| <a href="#">Trait 1: HLC_0311::10023826334</a><br>CAT on Chr 11 @ 34.493607 Mb<br>catalase                                     | <b>n</b><br>427      | <u>-0.488</u><br>427 | <u>-0.473</u><br>427 | <u>-0.458</u><br>427 | <u>0.516</u><br>427  | <u>0.077</u><br>427  | <u>-0.149</u><br>426 | <u>0.152</u><br>426  | <u>0.008</u><br>427  | <u>-0.336</u><br>427 | <u>-0.415</u><br>427 | <u>0.800</u><br>426  | <u>0.849</u><br>427  | <u>-0.712</u><br>427 | <u>-0.237</u><br>427 |
| <a href="#">Trait 2: HLC_0311::10023814607</a><br>GPX1 on Chr 3 @ 49.394608 Mb<br>glutathione peroxidase 1                     | <u>-0.438</u><br>427 | <b>n</b><br>427      | <u>0.467</u><br>427  | <u>0.495</u><br>427  | <u>-0.093</u><br>427 | <u>-0.361</u><br>427 | <u>0.195</u><br>426  | <u>-0.063</u><br>426 | <u>-0.146</u><br>427 | <u>0.302</u><br>427  | <u>0.340</u><br>427  | <u>-0.535</u><br>426 | <u>-0.519</u><br>427 | <u>0.391</u><br>427  | <u>-0.058</u><br>427 |
| <a href="#">Trait 3: HLC_0311::10023809881</a><br>GPX2 on Chr 14 @ 65.405871 Mb<br>glutathione peroxidase 2 (gastrointestinal) | <u>-0.359</u><br>427 | <u>0.463</u><br>427  | <b>n</b><br>427      | <u>0.332</u><br>427  | <u>-0.073</u><br>427 | <u>-0.306</u><br>427 | <u>0.207</u><br>426  | <u>-0.174</u><br>426 | <u>-0.134</u><br>427 | <u>0.263</u><br>427  | <u>0.417</u><br>427  | <u>-0.330</u><br>426 | <u>-0.366</u><br>427 | <u>0.337</u><br>427  | <u>0.032</u><br>427  |
| <a href="#">Trait 4: HLC_0311::10023805643</a><br>GPX3 on Chr 5 @ 150.408554 Mb                                                | <u>-0.388</u><br>427 | <u>0.500</u><br>427  | <u>0.616</u><br>427  | <b>n</b><br>427      | <u>-0.019</u><br>427 | <u>-0.233</u><br>427 | <u>0.285</u><br>426  | <u>-0.037</u><br>426 | <u>-0.181</u><br>427 | <u>0.127</u><br>427  | <u>0.050</u><br>427  | <u>-0.430</u><br>426 | <u>-0.443</u><br>427 | <u>0.440</u><br>427  | <u>0.180</u><br>427  |

P  
e  
a  
r  
s  
o  
n  
r

|                                                                                                |                      |                      |                      |                      |                      |                      |                      |                      |                      |                      |                      |                      |                      |                      |                      |  |
|------------------------------------------------------------------------------------------------|----------------------|----------------------|----------------------|----------------------|----------------------|----------------------|----------------------|----------------------|----------------------|----------------------|----------------------|----------------------|----------------------|----------------------|----------------------|--|
| glutathione peroxidase 3 (plasma)                                                              |                      |                      |                      |                      |                      |                      |                      |                      |                      |                      |                      |                      |                      |                      |                      |  |
| <a href="#">Trait 5: HLC_0311::10023815372</a>                                                 |                      |                      |                      |                      |                      |                      |                      |                      |                      |                      |                      |                      |                      |                      |                      |  |
| GPX4 on Chr 19 @ 1.106787 Mb<br>glutathione peroxidase 4 (phospholipid hydroperoxidase)        | <u>0.459</u><br>427  | <u>-0.022</u><br>427 | <u>0.139</u><br>427  | <u>0.215</u><br>427  | <b>n</b><br>427      | <u>-0.273</u><br>427 | <u>-0.157</u><br>426 | <u>-0.091</u><br>426 | <u>-0.376</u><br>427 | <u>-0.303</u><br>427 | <u>-0.379</u><br>427 | <u>0.385</u><br>426  | <u>0.437</u><br>427  | <u>-0.451</u><br>427 | <u>-0.200</u><br>427 |  |
| <a href="#">Trait 6: HLC_0311::10023813546</a>                                                 |                      |                      |                      |                      |                      |                      |                      |                      |                      |                      |                      |                      |                      |                      |                      |  |
| GPX5 on Chr 6 @ 28.502728 Mb<br>glutathione peroxidase 5 (epididymal androgen-related protein) | <u>0.066</u><br>427  | <u>-0.398</u><br>427 | <u>-0.401</u><br>427 | <u>-0.366</u><br>427 | <u>-0.264</u><br>427 | <b>n</b><br>427      | <u>-0.076</u><br>426 | <u>0.149</u><br>426  | <u>0.612</u><br>427  | <u>0.098</u><br>427  | <u>0.129</u><br>427  | <u>0.168</u><br>426  | <u>0.091</u><br>427  | <u>-0.096</u><br>427 | <u>0.129</u><br>427  |  |
| <a href="#">Trait 7: HLC_0311::10023819620</a>                                                 |                      |                      |                      |                      |                      |                      |                      |                      |                      |                      |                      |                      |                      |                      |                      |  |
| GPX5 on Chr 6 @ 28.502728 Mb<br>glutathione peroxidase 5 (epididymal androgen-related protein) | <u>-0.088</u><br>426 | <u>0.097</u><br>426  | <u>0.207</u><br>426  | <u>0.179</u><br>426  | <u>-0.017</u><br>426 | <u>-0.004</u><br>426 | <b>n</b><br>426      | <u>0.131</u><br>425  | <u>0.022</u><br>426  | <u>0.102</u><br>426  | <u>0.059</u><br>426  | <u>-0.030</u><br>425 | <u>-0.061</u><br>426 | <u>0.230</u><br>426  | <u>-0.162</u><br>426 |  |
| <a href="#">Trait 8: HLC_0311::10025911877</a>                                                 |                      |                      |                      |                      |                      |                      |                      |                      |                      |                      |                      |                      |                      |                      |                      |  |
| GPX6 on Chr 6 @ 28.471072 Mb<br>glutathione peroxidase 6 (olfactory)                           | <u>0.139</u><br>426  | <u>-0.090</u><br>426 | <u>-0.236</u><br>426 | <u>-0.142</u><br>426 | <u>-0.105</u><br>426 | <u>0.191</u><br>426  | <u>-0.102</u><br>425 | <b>n</b><br>426      | <u>0.225</u><br>426  | <u>0.066</u><br>426  | <u>0.019</u><br>426  | <u>0.174</u><br>425  | <u>0.174</u><br>426  | <u>-0.026</u><br>426 | <u>-0.077</u><br>426 |  |
| <a href="#">Trait 9: HLC_0311::10023821927</a>                                                 |                      |                      |                      |                      |                      |                      |                      |                      |                      |                      |                      |                      |                      |                      |                      |  |
| GPX7 on Chr 1 @ 53.074723 Mb<br>glutathione peroxidase 7                                       | <u>0.143</u><br>427  | <u>-0.312</u><br>427 | <u>-0.518</u><br>427 | <u>-0.660</u><br>427 | <u>-0.439</u><br>427 | <u>0.603</u><br>427  | <u>-0.109</u><br>426 | <u>0.214</u><br>426  | <b>n</b><br>427      | <u>0.214</u><br>427  | <u>0.337</u><br>427  | <u>0.069</u><br>426  | <u>-0.007</u><br>427 | <u>-0.075</u><br>427 | <u>0.148</u><br>427  |  |

|                                                                                                                                                               |                      |                      |                      |                      |                      |                      |                      |                      |                      |                      |                      |                      |                      |                      |                      |
|---------------------------------------------------------------------------------------------------------------------------------------------------------------|----------------------|----------------------|----------------------|----------------------|----------------------|----------------------|----------------------|----------------------|----------------------|----------------------|----------------------|----------------------|----------------------|----------------------|----------------------|
| <a href="#">Trait 10: HLC_0311::10025907159</a><br>GSR on Chr 8 @ 30.535579 Mb<br>glutathione reductase                                                       | <u>-0.296</u><br>427 | <u>0.268</u><br>427  | <u>0.077</u><br>427  | <u>-0.062</u><br>427 | <u>-0.272</u><br>427 | <u>0.100</u><br>427  | <u>0.037</u><br>426  | <u>0.004</u><br>426  | <u>0.252</u><br>427  | <b>n</b><br>427      | <u>0.513</u><br>427  | <u>-0.204</u><br>426 | <u>-0.243</u><br>427 | <u>0.284</u><br>427  | <u>-0.077</u><br>427 |
| <a href="#">Trait 11: HLC_0311::10025903928</a><br>GSS on Chr 20 @ 33.516235 Mb<br>glutathione synthetase                                                     | <u>-0.353</u><br>427 | <u>0.297</u><br>427  | <u>0.240</u><br>427  | <u>-0.071</u><br>427 | <u>-0.346</u><br>427 | <u>0.140</u><br>427  | <u>0.032</u><br>426  | <u>0.015</u><br>426  | <u>0.329</u><br>427  | <u>0.487</u><br>427  | <b>n</b><br>427      | <u>-0.293</u><br>426 | <u>-0.354</u><br>427 | <u>0.177</u><br>427  | <u>0.126</u><br>427  |
| <a href="#">Trait 12: HLC_0311::10023815327</a><br>SOD1 on Chr 21 @ 33.041243 Mb<br>superoxide dismutase 1, soluble (amyotrophic lateral sclerosis 1 (adult)) | <u>0.803</u><br>426  | <u>-0.512</u><br>426 | <u>-0.348</u><br>426 | <u>-0.514</u><br>426 | <u>0.283</u><br>426  | <u>0.220</u><br>426  | <u>-0.048</u><br>425 | <u>0.150</u><br>425  | <u>0.344</u><br>426  | <u>-0.124</u><br>426 | <u>-0.198</u><br>426 | <b>n</b><br>426      | <u>0.962</u><br>426  | <u>-0.575</u><br>426 | <u>-0.224</u><br>426 |
| <a href="#">Trait 13: HLC_0311::10033668826</a><br>SOD1 on Chr 21 @ 33.041243 Mb<br>superoxide dismutase 1, soluble (amyotrophic lateral sclerosis 1 (adult)) | <u>0.842</u><br>427  | <u>-0.492</u><br>427 | <u>-0.369</u><br>427 | <u>-0.524</u><br>427 | <u>0.324</u><br>427  | <u>0.152</u><br>427  | <u>-0.065</u><br>426 | <u>0.155</u><br>426  | <u>0.292</u><br>427  | <u>-0.161</u><br>427 | <u>-0.252</u><br>427 | <u>0.971</u><br>426  | <b>n</b><br>427      | <u>-0.585</u><br>427 | <u>-0.254</u><br>427 |
| <a href="#">Trait 14: HLC_0311::10023816501</a><br>SOD2 on Chr 6 @ 160.102754 Mb<br>superoxide dismutase 2, mitochondrial                                     | <u>-0.696</u><br>427 | <u>0.372</u><br>427  | <u>0.249</u><br>427  | <u>0.327</u><br>427  | <u>-0.416</u><br>427 | <u>-0.092</u><br>427 | <u>0.099</u><br>426  | <u>-0.041</u><br>426 | <u>-0.119</u><br>427 | <u>0.264</u><br>427  | <u>0.120</u><br>427  | <u>-0.548</u><br>426 | <u>-0.554</u><br>427 | <b>n</b><br>427      | <u>0.078</u><br>427  |

|                                                 |                      |                      |                     |                     |                      |                     |                      |                      |                     |                      |                     |                      |                      |                     |                                      |
|-------------------------------------------------|----------------------|----------------------|---------------------|---------------------|----------------------|---------------------|----------------------|----------------------|---------------------|----------------------|---------------------|----------------------|----------------------|---------------------|--------------------------------------|
| <a href="#">Trait 15: HLC_0311::10023810228</a> |                      |                      |                     |                     |                      |                     |                      |                      |                     |                      |                     |                      |                      |                     |                                      |
| SOD3 on Chr 4 @ 24.802467 Mb                    | $\frac{-0.219}{427}$ | $\frac{-0.091}{427}$ | $\frac{0.018}{427}$ | $\frac{0.133}{427}$ | $\frac{-0.180}{427}$ | $\frac{0.086}{427}$ | $\frac{-0.038}{426}$ | $\frac{-0.095}{426}$ | $\frac{0.076}{427}$ | $\frac{-0.080}{427}$ | $\frac{0.113}{427}$ | $\frac{-0.235}{426}$ | $\frac{-0.254}{427}$ | $\frac{0.021}{427}$ | <b><i>n</i></b><br>$\frac{427}{427}$ |
| superoxide dismutase 3, extracellular           |                      |                      |                     |                     |                      |                     |                      |                      |                     |                      |                     |                      |                      |                     |                                      |
